# Supplementary material for: Novel hierarchical porous Fe2O3@GA composites for solar-Fenton catalysis of dyes
Source: Royal Society of Chemistry journal article supplement (doi:10.1039/d4cy00076e), 2024-01-01
Supplement: d4cy00076e1.pdf [file d4cy00076e1.pdf]

## Supporting Information

### **Novel hierarchical porous Fe<sub>2</sub>O<sub>3</sub>@GA composite for solar-Fenton catalysis of dyes**

Xiaomei Li <sup>a, b</sup>, Jun Qin <sup>b</sup>, Xiao Zhang <sup>b</sup>, Yu Zhang <sup>b</sup>, Zhixiong Liu <sup>b</sup>, Jianfeng Jia <sup>a\*</sup>,  
Haishun Wu <sup>a</sup>, Feng Feng <sup>a, c\*</sup>, Yunfeng Bai <sup>b</sup>

<sup>a</sup> School of Chemical and Material Science, Shanxi Normal University, Taiyuan  
030006, China

<sup>b</sup> College of Chemistry and Chemical Engineering, Shanxi Datong University, Datong  
037009, China

<sup>c</sup> Department of Energy Chemistry and Materials Engineering, Shanxi Institute of  
Energy, Taiyuan 030600, China

Corresponding authors.

E-mail: [jiajf@dns.sxnu.edu.cn](mailto:jiajf@dns.sxnu.edu.cn) (J. Jia), [feng-feng64@263.net](mailto:feng-feng64@263.net) (F. Feng)

## Section A: Additional Schemes

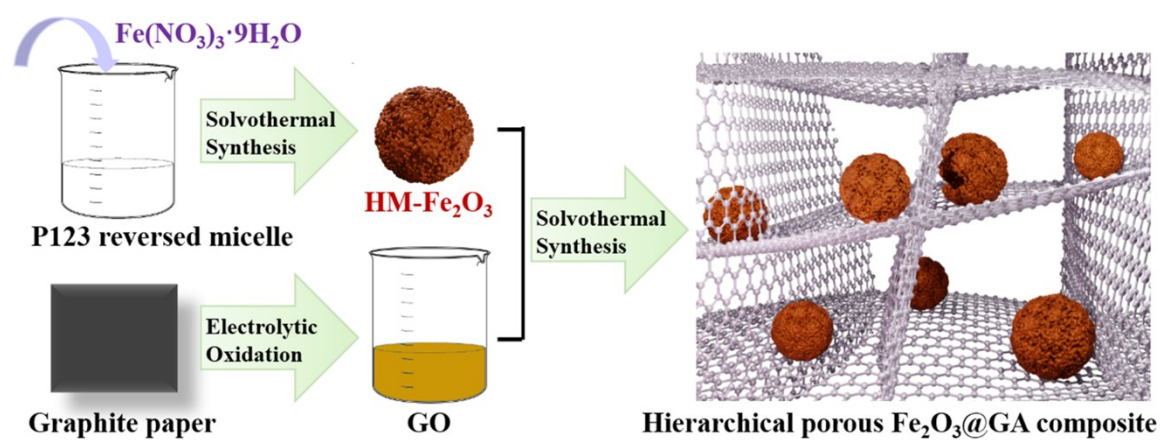

**Scheme S1** Synthesis process of hierarchical porous composite.

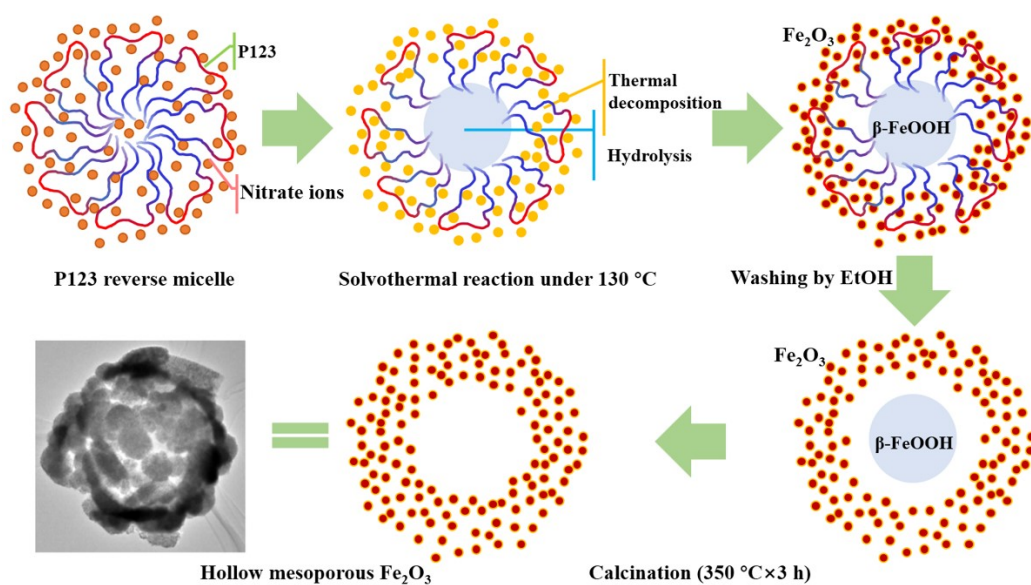

**Scheme S2** Formation mechanism of HM- $\text{Fe}_2\text{O}_3$ .

## Section B: Additional Texts

### Text S1

#### *Synthesis of GO*

The dried graphite paper was fixed at the anode of the electrolytic cell and immersed into concentrated sulfuric acid for pre-intercalation under +1.5 V voltage. Subsequently, the intercalated graphite paper, which was 8~10 times thicker than the original, was slowly dipped into 50 % (m/m) sulfuric acid electrolyte as a sacrificial anode for electrolytic oxidation under +7 V voltage. In the electrolytic oxidation reaction, the sufficiently oxidized GO was continuously peeled off into the sulfuric acid electrolyte, separated by filtration and repeatedly cleaned with deionized water. Finally, the GO was ultrasonically dispersed into water to form a homogeneous dispersion (~15 mg/mL) for further use.

### Text S2

#### *Formation mechanism of HM-Fe<sub>2</sub>O<sub>3</sub>*

The formation mechanism of HM-Fe<sub>2</sub>O<sub>3</sub> was proposed in Scheme S2. First, P123 reverse micelles formed in n-butanol solution after sufficient uniform stirring. The micelle has a relatively stable spherical morphology, the core of which was formed by the hydrophilic block of P123 and a small amount of water, and the hydrophobic block of P123 formed the outer structure. Iron species were well dispersed around the reverse micellar with the assistance of n-butanol and HNO<sub>3</sub>. Second, when the micellar mixture was transferred to a solvothermal reaction under 130 °C, the nitrate began to decompose gradually to form Fe<sub>2</sub>O<sub>3</sub> grains, aggregating into loose secondary particles. Slow hydrolysis also occurred inside the hydrophilic core to produce β-FeOOH. Thus, a relatively stable intermediate composed of Fe<sub>2</sub>O<sub>3</sub>-P123 shell and β-FeOOH core formed. Third, the intermediate was washed and calcined to remove P123 and NO<sub>x</sub>, and β-FeOOH gradually decomposed into Fe<sub>2</sub>O<sub>3</sub> and fused into the shell to form hollow

Fe<sub>2</sub>O<sub>3</sub> spheres. During the continuous calcination, the mesopores in Fe<sub>2</sub>O<sub>3</sub> particles opened with the removal of micelles.

To verify the correlation between nitrate decomposition and Fe<sub>2</sub>O<sub>3</sub> formation mentioned above. Fe(NO<sub>3</sub>)<sub>3</sub>·9H<sub>2</sub>O was replaced by FeCl<sub>3</sub>·6H<sub>2</sub>O for comparison, and no precipitate was found after the solvothermal reaction. The supernatant after the solvothermal reaction was tested by UV-Vis absorption, and the characteristic band of NO<sub>x</sub> at 320–400 nm proved the decomposition of nitrate (**Fig. S4**). XRD pattern (**Fig. S5**) of the intermediate mentioned above shows the characteristic peaks of both Fe<sub>2</sub>O<sub>3</sub> and β-FeOOH (JCPDS NO. 75-1594), suggesting the formation of β-FeOOH. The intermediate's SEM image (**Fig. S6**) exhibits the flocculent loose β-FeOOH structure inside the Fe<sub>2</sub>O<sub>3</sub> shell. These tests prove that the formation process of HM-Fe<sub>2</sub>O<sub>3</sub> materials includes the above three stages.

## Section C: Additional Figures

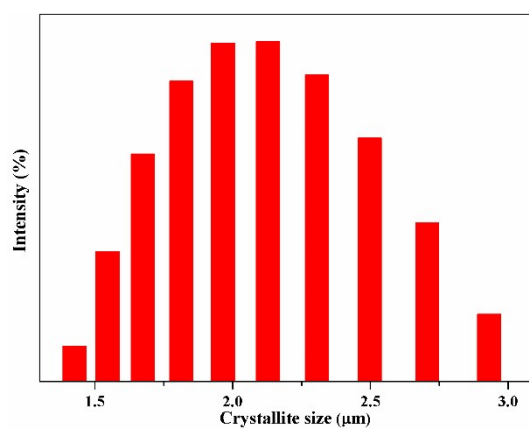

Fig. S1. Size distribution of HM-Fe<sub>2</sub>O<sub>3</sub>.

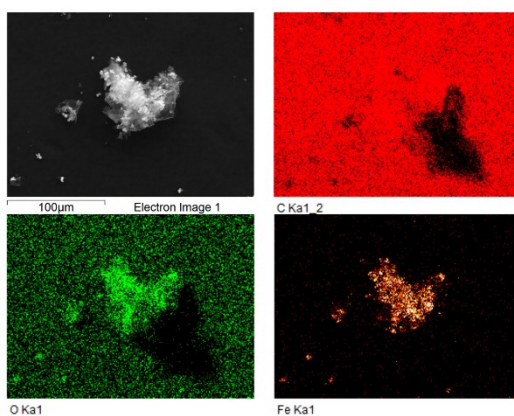

Fig. S2. EDX element mappings of H-Fe<sub>2</sub>O<sub>3</sub>@GA composite.

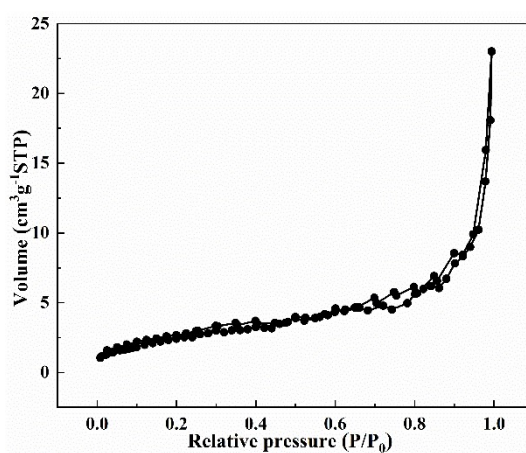

Fig. S3. N<sub>2</sub>-adsorption-desorption isotherms of R-Fe<sub>2</sub>O<sub>3</sub>.

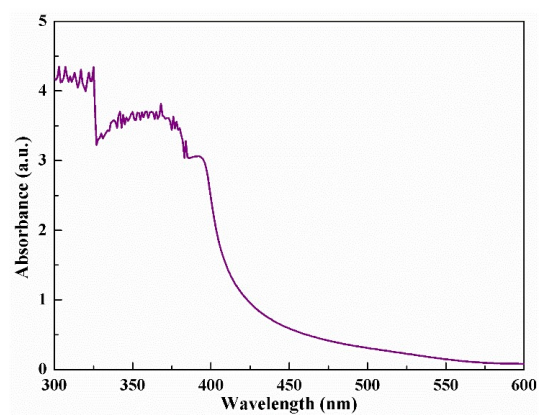

**Fig. S4.** UV-Vis spectra of the reaction solution after solvothermal reaction.

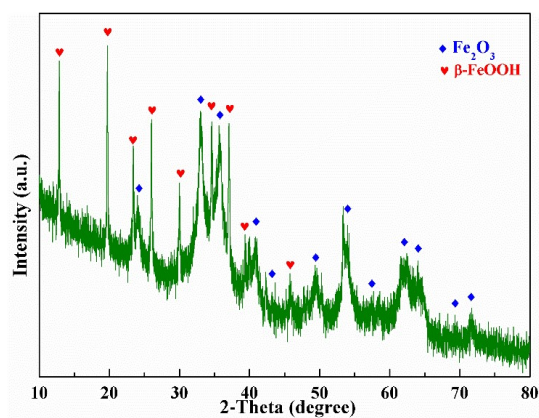

**Fig. S5.** Wide-angle XRD pattern of the product before calcination.

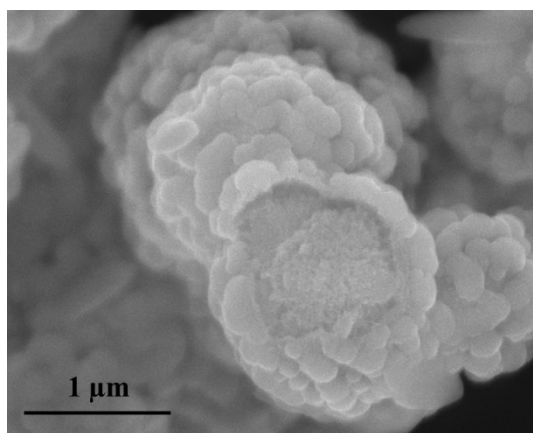

**Fig. S6.** SEM image of the product of solvothermal reaction before calcination.

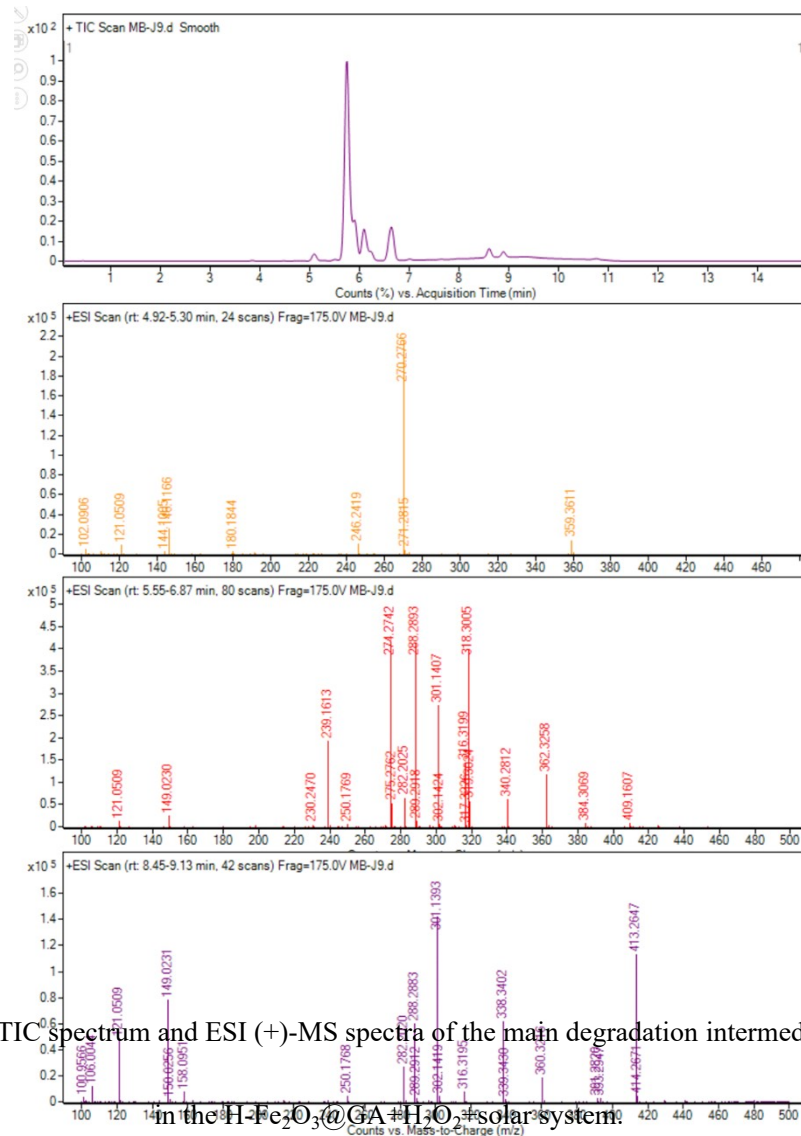

**Fig. S7.** LC-TIC spectrum and ESI (+)-MS spectra of the main degradation intermediates of MB in the  $\text{H-Fe}_2\text{O}_3@\text{GA}+\text{H}_2\text{O}_2$  solar system.

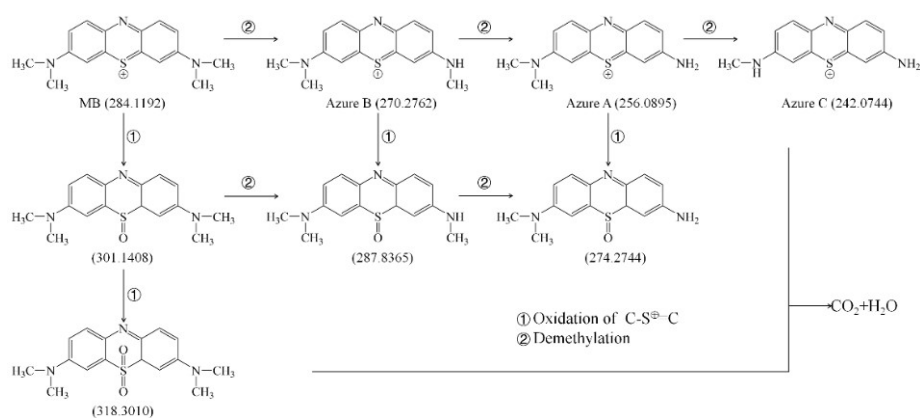

**Fig. S8.** Proposed degradation pathway of MB in  $\text{H-Fe}_2\text{O}_3@\text{GA}+\text{H}_2\text{O}_2$  solar system.

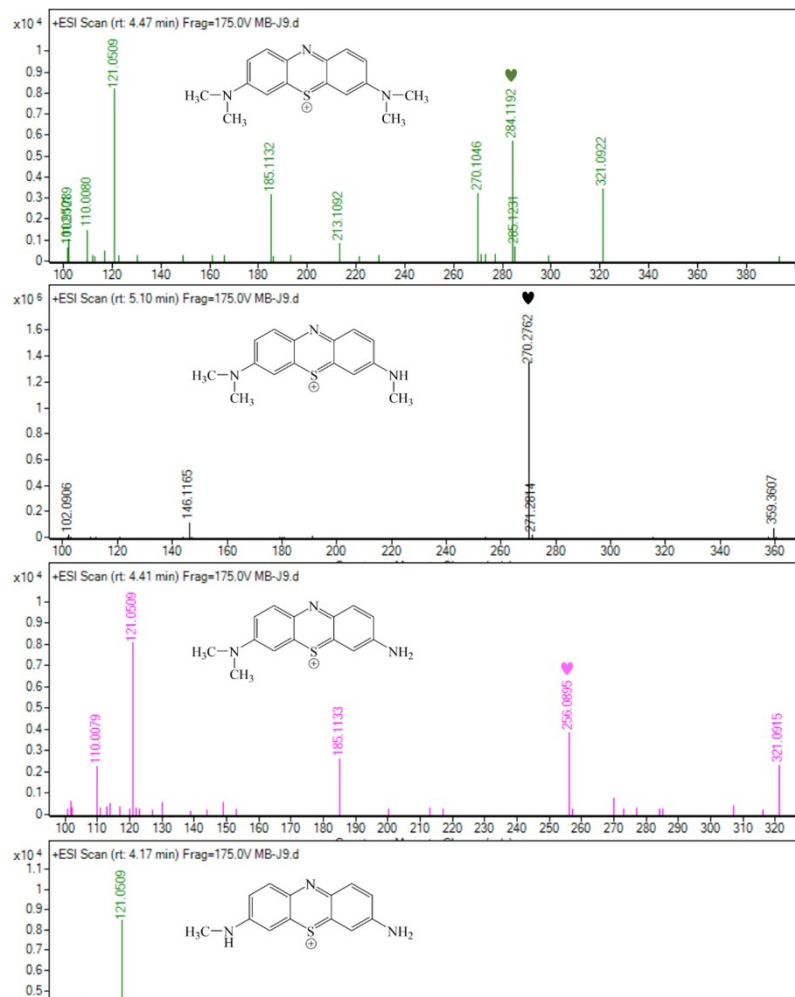

Fig. S9. T

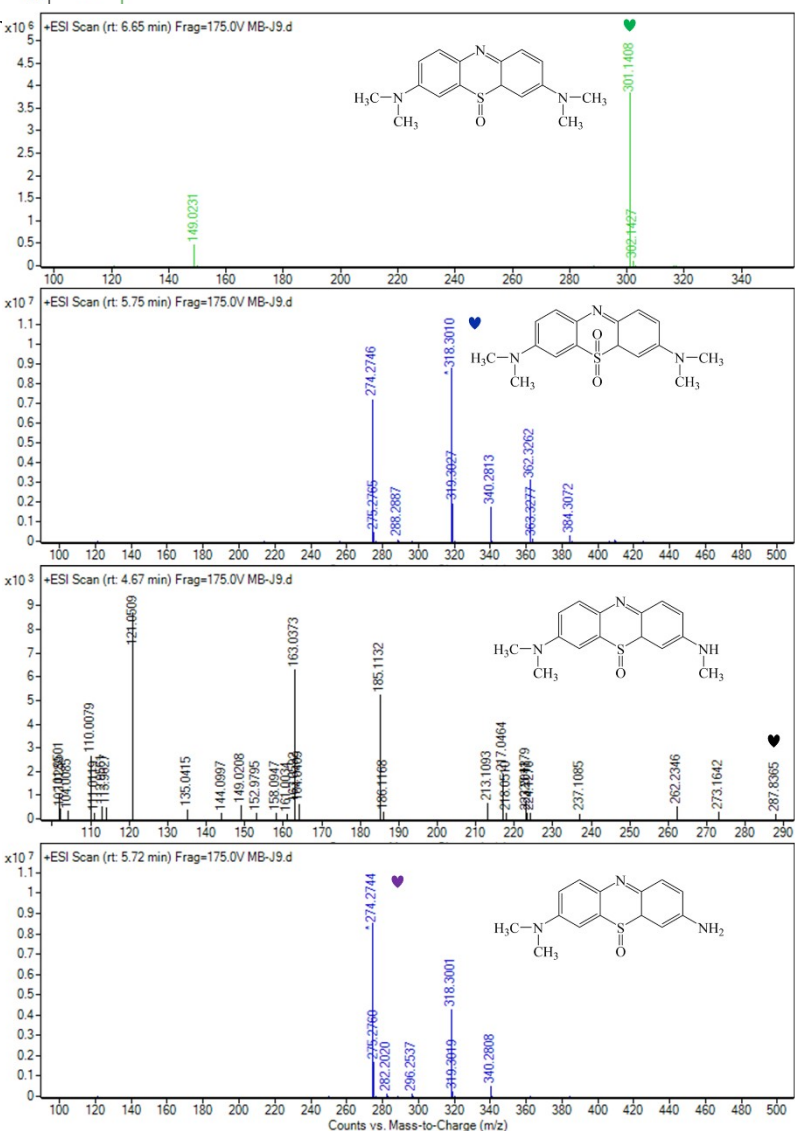

lation.

**Fig. S10.** The ESI (+)-MS spectra of degradation intermediates of MB by oxidation of C=S<sup>+</sup>-C groups.

## Section D: Additional Tables

**Table S1.** Structural parameters of materials on BET.

| Materials                                | Surface area (m <sup>2</sup> /g) | Pore volume (cm <sup>3</sup> /g) | Pore size (nm) |
|------------------------------------------|----------------------------------|----------------------------------|----------------|
| HM-Fe <sub>2</sub> O <sub>3</sub>        | 43.69                            | 0.18                             | 11.72          |
| GA                                       | 38.76                            | 0.15                             | 14.10          |
| H-Fe <sub>2</sub> O <sub>3</sub> @GA-30% | 37.50                            | 0.12                             | 14.36          |
| H-Fe <sub>2</sub> O <sub>3</sub> @GA-43% | 30.67                            | 0.12                             | 10.68          |
| H-Fe <sub>2</sub> O <sub>3</sub> @GA-58% | 35.16                            | 0.14                             | 12.21          |
| R-Fe <sub>2</sub> O <sub>3</sub>         | 7.88                             | 0.03                             | 15.59          |

**Table S2.** Removal efficiency and the first-order reaction rate constant of MB under different conditions.

| Reaction condition                                                        | $\eta/\%$ | $K/\text{min}^{-1}$ | $R^2$  |
|---------------------------------------------------------------------------|-----------|---------------------|--------|
| H-Fe <sub>2</sub> O <sub>3</sub> @GA+H <sub>2</sub> O <sub>2</sub> +solar | 91.8      | 0.0314              | 0.9522 |

|                                                                          |      |        |        |
|--------------------------------------------------------------------------|------|--------|--------|
| H-Fe <sub>2</sub> O <sub>3</sub> @GA+H <sub>2</sub> O <sub>2</sub> +dark | 43.2 | 0.0048 | 0.8566 |
| H-Fe <sub>2</sub> O <sub>3</sub> @GA+solar                               | 55.6 | 0.0080 | 0.9769 |
| H-Fe <sub>2</sub> O <sub>3</sub> @GA+dark                                | 23.6 | 0.0015 | 0.6917 |
| HM-Fe <sub>2</sub> O <sub>3</sub> +H <sub>2</sub> O <sub>2</sub> +solar  | 46.5 | 0.0061 | 0.9633 |
| R-Fe <sub>2</sub> O <sub>3</sub> + H <sub>2</sub> O <sub>2</sub> +solar  | 39.3 | 0.0046 | 0.9352 |
| H <sub>2</sub> O <sub>2</sub> +solar                                     | 6.5  | 0.0005 | 0.9770 |
| Solar                                                                    | 5.4  | 0.0006 | 0.8131 |

**Table S3.** Removal efficiency and the first-order reaction rate constant of MB under different initial MB concentrations, H<sub>2</sub>O<sub>2</sub> dosages, pHs, and Fe<sub>2</sub>O<sub>3</sub> contents.

| Variations                             | Concentration | $\eta/\%$ | $K/\text{min}^{-1}$ | $R^2$  |
|----------------------------------------|---------------|-----------|---------------------|--------|
| MB concentration                       | 20 mg/L       | 97.5      | 0.0428              | 0.9145 |
|                                        | 30 mg/L       | 95.3      | 0.0387              | 0.9148 |
|                                        | 40 mg/L       | 95.1      | 0.0353              | 0.9882 |
|                                        | 50 mg/L       | 91.8      | 0.0312              | 0.9445 |
| H <sub>2</sub> O <sub>2</sub>          | 0.4 mM        | 95.1      | 0.0353              | 0.9882 |
|                                        | 0.7 mM        | 95.4      | 0.0336              | 0.9726 |
|                                        | 1.0 mM        | 96.3      | 0.0372              | 0.9812 |
|                                        | 2.0 mM        | 95.8      | 0.0370              | 0.9949 |
| pH                                     | 3.02          | 96.4      | 0.0350              | 0.9165 |
|                                        | 7.08          | 95.1      | 0.0353              | 0.9882 |
|                                        | 10.20         | 88.5      | 0.0243              | 0.9266 |
| Fe <sub>2</sub> O <sub>3</sub> content | 30%           | 75.7      | 0.0161              | 0.9879 |

|     |      |        |        |
|-----|------|--------|--------|
| 43% | 95.1 | 0.0353 | 0.9882 |
| 58% | 81.5 | 0.0184 | 0.9585 |
